# Supplementary material for: CytoSorb hemoperfusion markedly attenuates circulating cytokine concentrations during systemic inflammation in humans in vivo
Source: PubMed Central journal article supplement (PMC10029173; doi:10.1186/s13054-023-04391-z), 2023-03-21

▲ CytoSorb      ● Control

### HLA-DR expression

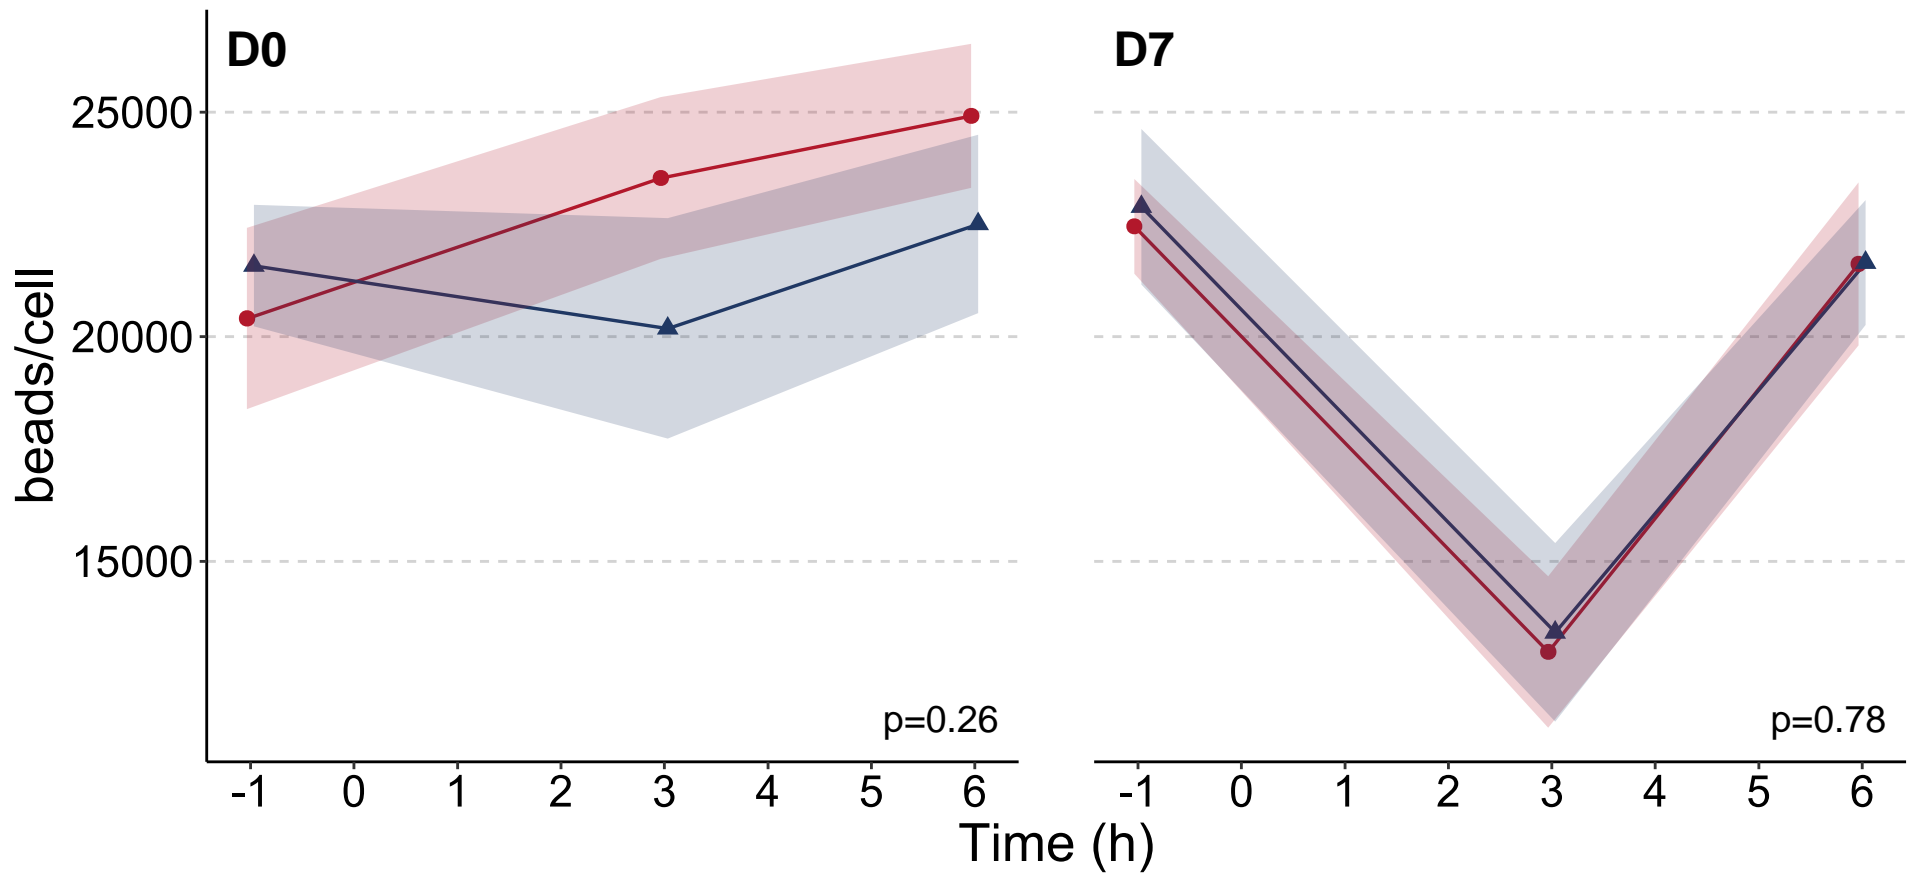

Supplement: 13054_2023_4391_MOESM2_ESM.pdf [file 13054_2023_4391_MOESM2_ESM.pdf]
