# Supplementary material for: CytoSorb hemoperfusion markedly attenuates circulating cytokine concentrations during systemic inflammation in humans in vivo
Source: PubMed Central journal article supplement (PMC10029173; doi:10.1186/s13054-023-04391-z), 2023-03-21
Supplement: 13054_2023_4391_MOESM6_ESM.pdf [file 13054_2023_4391_MOESM6_ESM.pdf]

▲ CytoSorb

● Control

**A****Hemoglobin**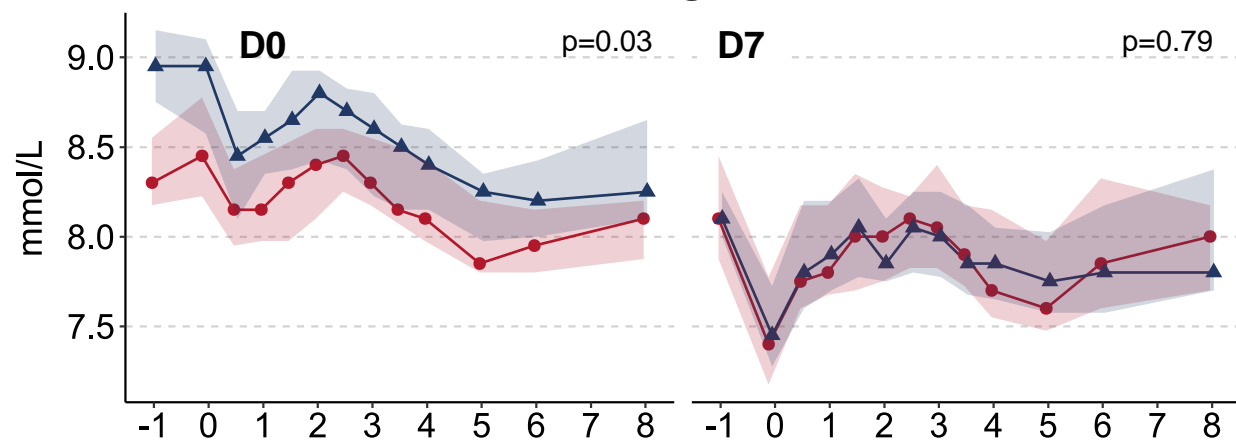**B****Platelets**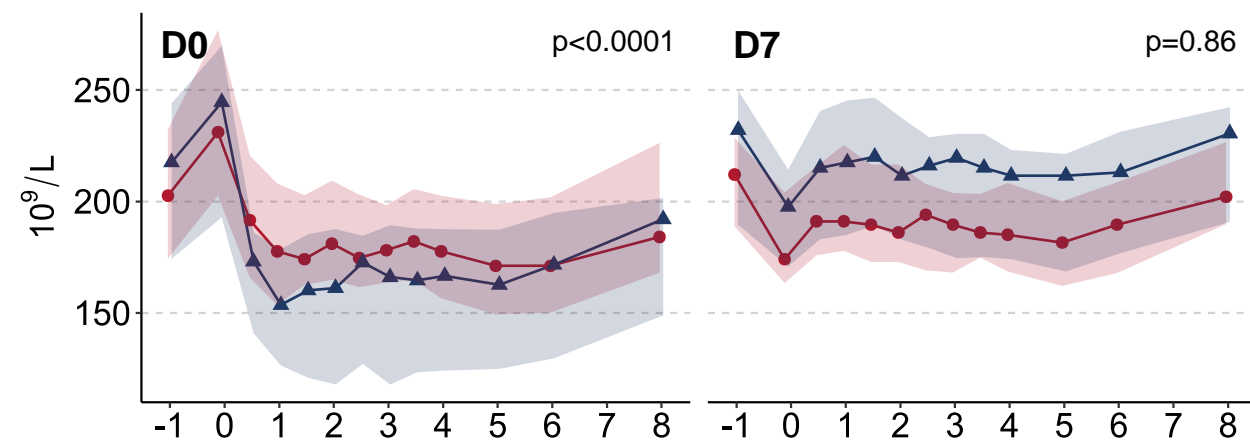**C****Leukocytes**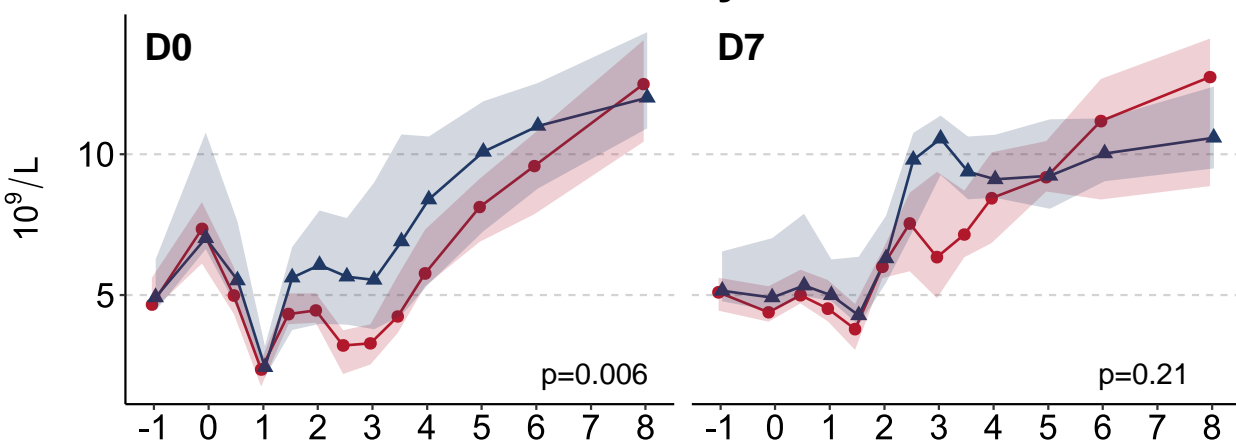**D****Neutrophils**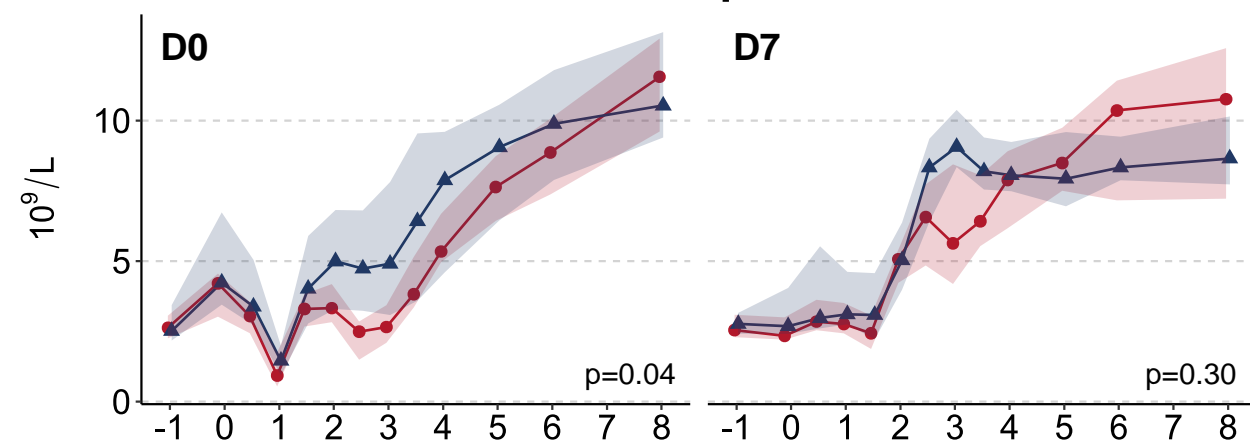**E****Lymphocytes**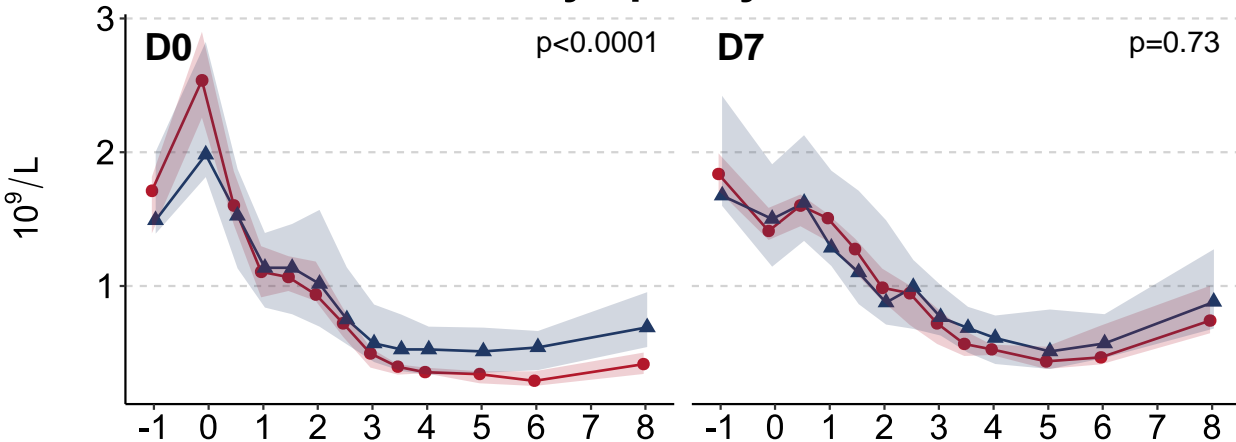**F****Monocytes**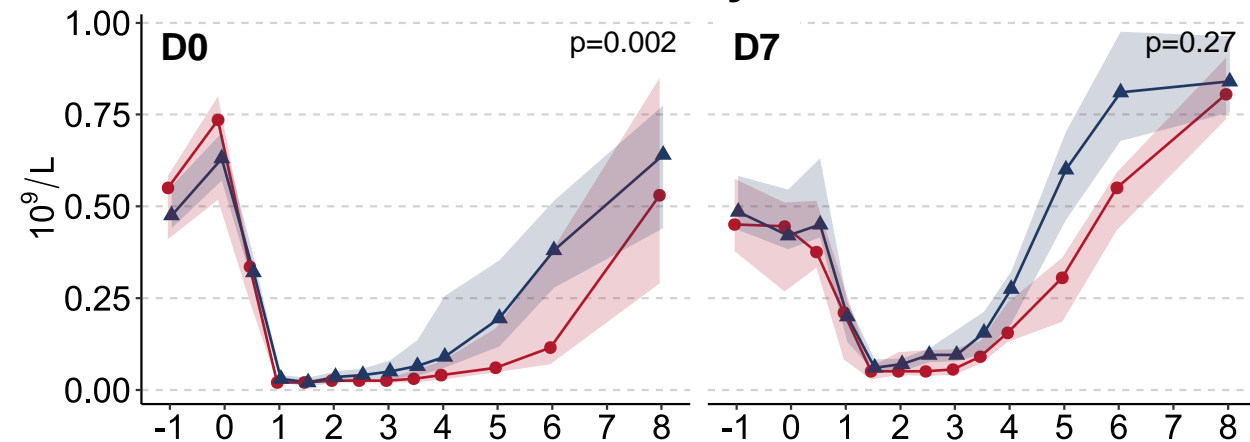

Time (h)
